# Supplementary material for: EPHX1 mutations cause a lipoatrophic diabetes syndrome due to impaired epoxide hydrolysis and increased cellular senescence
Source: eLife. 2021 Aug 3;10:e68445. doi: 10.7554/eLife.68445 (PMC8331186; doi:10.7554/eLife.68445)
Supplement: Supplementary file 1. — Variants with an allele frequency > 0.001 were not considered since their frequency is not compatible with the prevalence of this very rare disorder. The gnomAD database (https://gnomad.broadinstitute.org/) was used to determine the variant frequency in the general population. Expression profile were extracted from the GTex portal (https://www.gtexportal.org). Splice variants located outside of the canonical sites were not considered. The CADD (Combined Annotation Dependent Depletion) score was used for first scoring of variant deleteriousness (https://cadd-staging.kircherlab.bihealth.org/). A score > 20 argues for a pathogenic effect. Other bioinformatic tools of pathogenicity prediction were considered including SIFT, Polyphen2, MutationTaster, and REVEL. On each line, the arguments against the involvement of a given variant in the observed phenotype are indicated by an asterisk. Each variant can be excluded by at least two independent items. hmz: homozygous; htz: heterozygous; na: not applicable. [file elife-68445-supp1.xlsx]

## Sheet: Feuil1
	Gene	Expression Profile	Function	Variant location (cDNA)	Variant location (protein)	Genotype	Allele frequency in the general population (gnomAD)	CADD score > 20	Multiple lines of computational evidences supporting a deleterious effect	Gene previously implicated in monogenic human diseases
						status
	De novo
	TMEM132E	mostly brain, kidney, and inner ear*	connection of the extracellular medium with the intracellular actin cytoskeleton	NM_00130443:	p.(Ser981Arg)	htz	absent	yes	yes	autosomal recessive non syndromic hearing loss*
				c.2943C>A
	Autosomal recessive with a homozygous variant
	NWD1	large, mostly brain*	androgen receptor activity*	NM_00100752:	p.(Arg110Lys)	hmz	9x10-4	no*	no*	no
				c.329G>A			(rs55976634)
	TAS2R13	large	taste receptor cells of the tongue and palate epithelia*	NM_023920:	p.(His94Arg)	hmz	1x10-3	yes	no*	no
				c.281A>G			(rs34885344)
	Autosomal recessive with compound heterozygous variants
	MYO15B	large	transcribed, unprocessed pseudogene*	NM_00130924:	na	htz	7x10-4	na	no*	no
				c.3190C>T			(rs183806034)
	MYO15B	large	transcribed, unprocessed pseudogene*	NM_00130924:	na	htz	7x10-4	na	no*	no
				c.3358G>T			(rs141763815)
	MYO15B	large	transcribed, unprocessed pseudogene*	NM_00130924:	na	htz	5x10-4	na	no*	no
				c.4030C>T			(rs566519841)
	MYO15B	large	transcribed, unprocessed pseudogene*	NM_00130924:	na	htz	6x10-4	na	no*	no
				c.5122C>G			(rs181126557)
	Supplementary File 1. Characteristics of additional rare variants identified in patient 1 according to their mode of inheritance.
